# Supplementary material
Source: PubMed Central journal article supplement (PMC2795708)

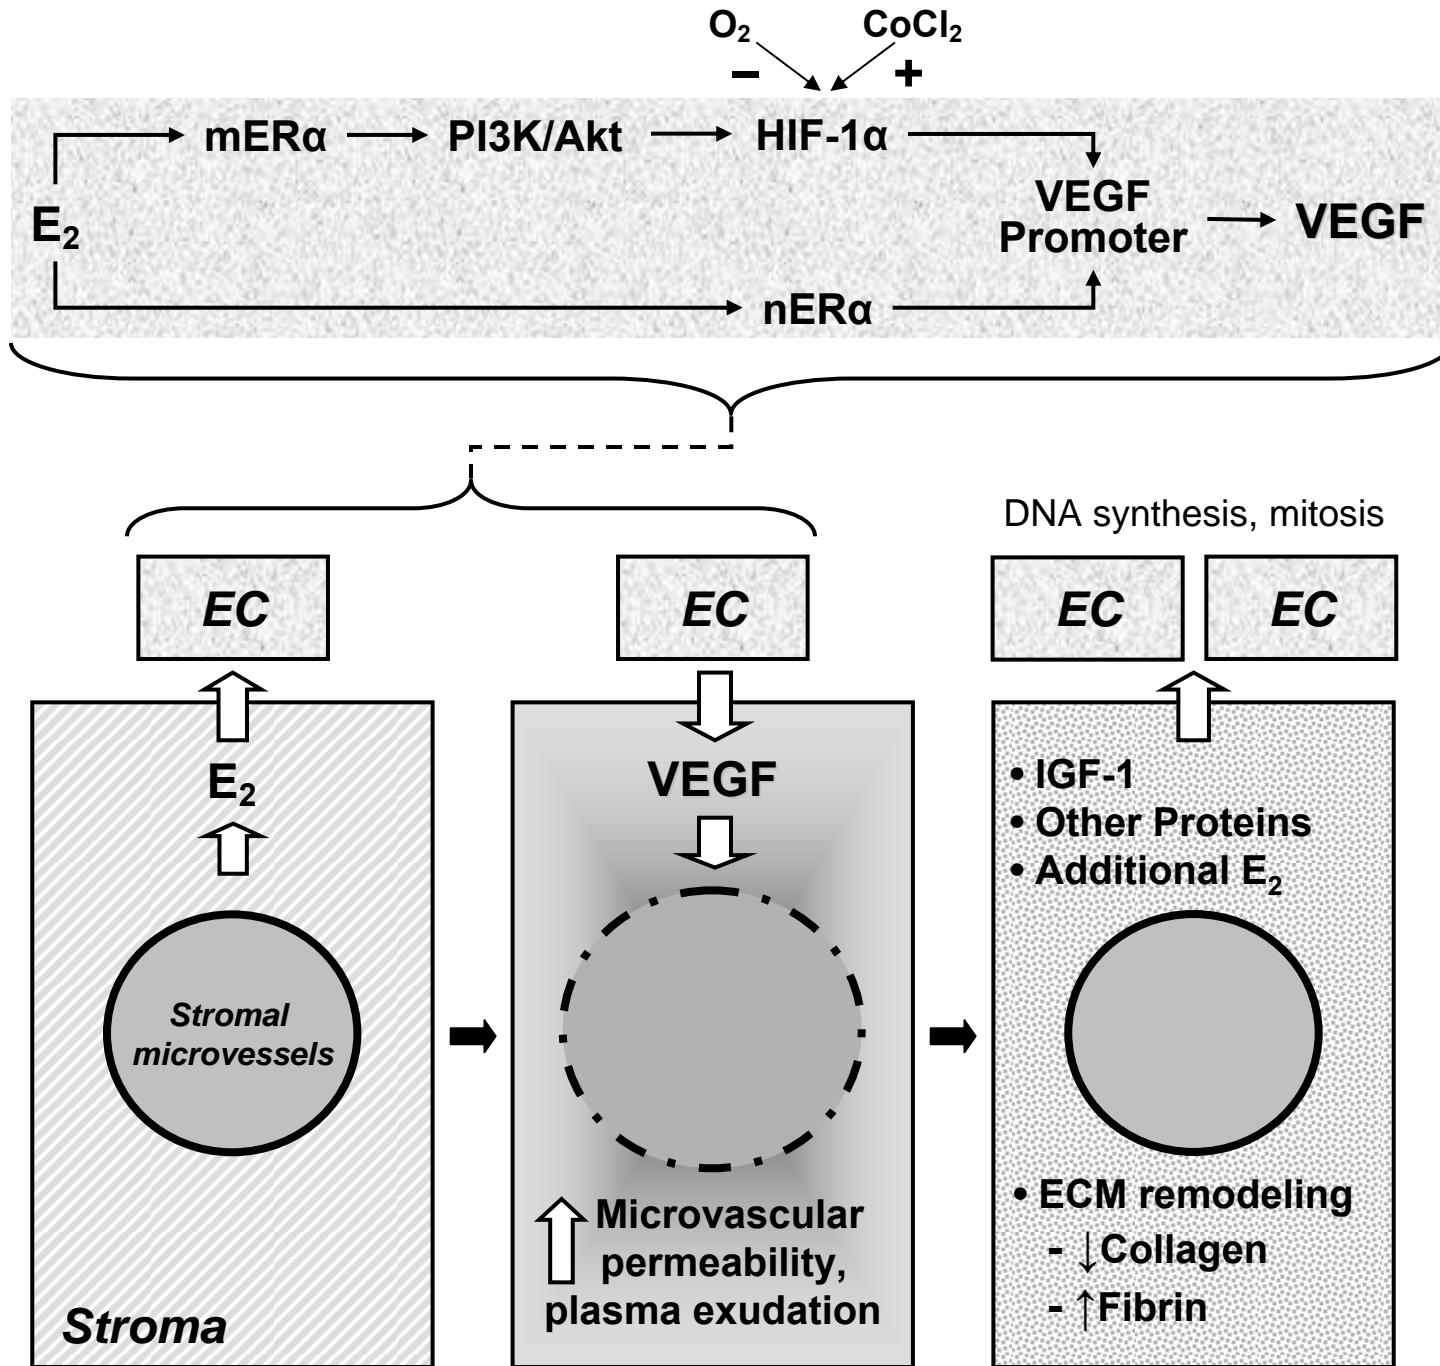

Supplemental Figure 1

Supplement: en.2009-0884_1.pdf [file en.2009-0884_1.pdf]
